# Supplementary material
Source: PubMed Central journal article supplement (PMC3063729)
Supplement: supp_mol.110.069633_Supplemental_Figure_1.pdf [file supp_mol.110.069633_Supplemental_Figure_1.pdf]

## Supplemental Data

**Title:** Novel regulation of NF-YB by *miR-485-3p* affects expression of DNA topoisomerase II $\alpha$  and drug responsiveness

**Authors:** Cheng-Fen Chen, Xiaolong He, Ahmet Dirim Arslan, Yin-Yuan Mo, William C. Reinhold, Yves Pommier and William T. Beck

**Journal:** Molecular Pharmacology

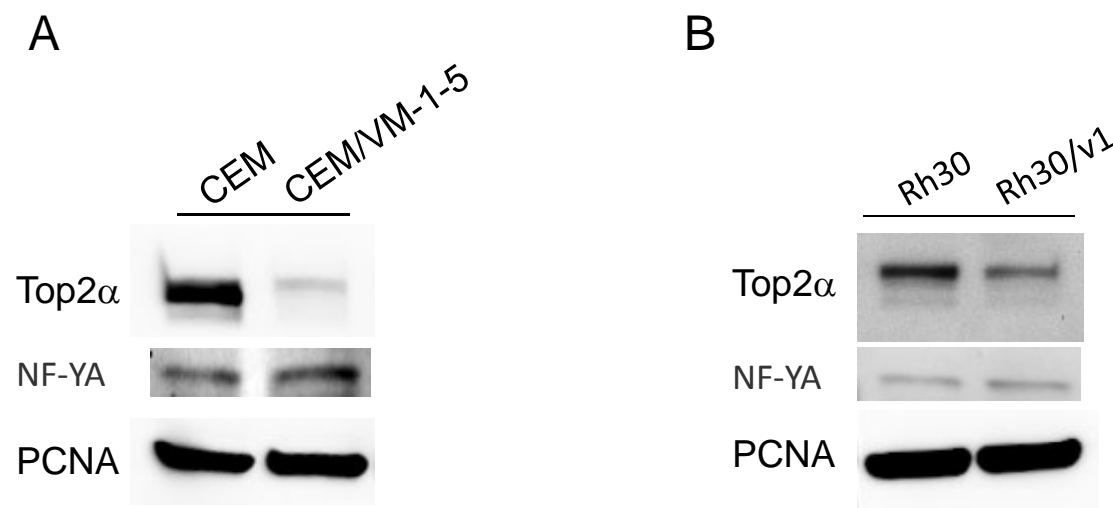

Fig. S1. Western blots of nuclear Top2 $\alpha$  and NF-YA expression in CEM and CEM/VM-1-5 cells (A) and Rh30 and Rh30/v1 cells (B). Proliferating cell nuclear antigen (PCNA) served as loading control for nuclear proteins.
